# Supplementary material for: Efficient degradation of tetracycline via peroxymonosulfate activation by phosphorus-doped biochar loaded with cobalt nanoparticles
Source: Royal Society of Chemistry journal article supplement (doi:10.1039/d4dt00758a), 2024-01-01
Supplement: d4dt00758a1.pdf [file d4dt00758a1.pdf]

## Supporting Information

### Efficient degradation of tetracycline via peroxymonosulfate activation by phosphorus-doped biochar loaded with cobalt nanoparticles

Yunpeng Wang,<sup>a</sup> Ting Jiao,<sup>a</sup> Peng Zhang,<sup>a</sup> Wanyi Hou,<sup>a</sup> Zhongping Li,<sup>a,b\*</sup> Chuan Dong<sup>a,b</sup>, Wanying Zhang,<sup>c</sup> Lei Zhang<sup>d</sup>

<sup>a</sup>Institute of Environmental Science, School of Environmental and Resources Sciences, Shanxi University, 030006, China

<sup>b</sup>Shanxi Laboratory for Yellow River, Taiyuan 030006, China;

<sup>c</sup>School of chemistry and materials science, Shanxi Normal University, Taiyuan 030031, China

<sup>d</sup>Department of Biology, Xinzhou Normal University, Xinzhou 034000, China

Corresponding author email: [z1104@sxu.edu.cn](mailto:z1104@sxu.edu.cn) (Zhongping Li)

#### Text S1. Chemicals and reagents

Sunflower seeds were purchased from a supermarket in Taiyuan, Shanxi province. After cleaning the sunflower husks with tap water, deionized water was added and heated at 80 °C for 4 h. After cooling, the husks were left submerged for 12 h to remove the residual chemicals. Subsequently, the soaked husks were placed in an oven at 60 °C for drying, followed by grinding through a 60 mesh sieve, and the ground husk was collected for later use. All the chemicals were of high-purity grade; therefore, there was no need for further purification before use. PMS ( $\text{KHSO}_5 \text{ \AA } 0.5 \text{ KHSO}_4 \text{ \AA } 0.5 \text{ K}_2\text{SO}_4$ ), TCH, tert butanol (TBA), p-benzoquinone (p-BQ) L-histidine (L-His),  $\text{H}_2\text{SO}_4$ , NaOH, and other raw materials were sourced from Aladdin Corporation, China. Other chemicals, including hexahydrate and cobalt nitrate, 5,5-dimethyl-1-pyrroline N-oxide (DMPO), 2,2,6,6-tetramethylpiperidine, chromatographically pure methanol, ethanol, and acetonitrile were purchased from China National Pharmaceutical Chemical Reagent Co., Ltd. Deionised water was used throughout the study.

#### Text S2. Characterizations

The morphology and structure of Co NP-PBC were analysed in detail using a FEI Talos F200S transmission electron microscopy (TEM). The surface chemical composition and elemental composition of Co NP-PBC were determined by X-ray photoelectron spectroscopy (XPS) on a Thermo Scientific K-Alpha+ XPS spectrometer. The defect structures of BC, PBC, and Co NP-PBC were determined

using a HORIBA LabRAM HR Evolution Raman spectrometer. The electrochemical measurements were performed using a CHI 660E workstation. Intermediate TCH was detected using High performance liquid chromatography tandem mass spectrometry (HPLC-MS). Electron paramagnetic resonance (EPR) spectroscopy was used to detect the free radicals in the Co NP-PBC/PMS system. Toxicity analysis software (TEST version 5.1.2) was used to assess the risk of developing TC and its intermediates.

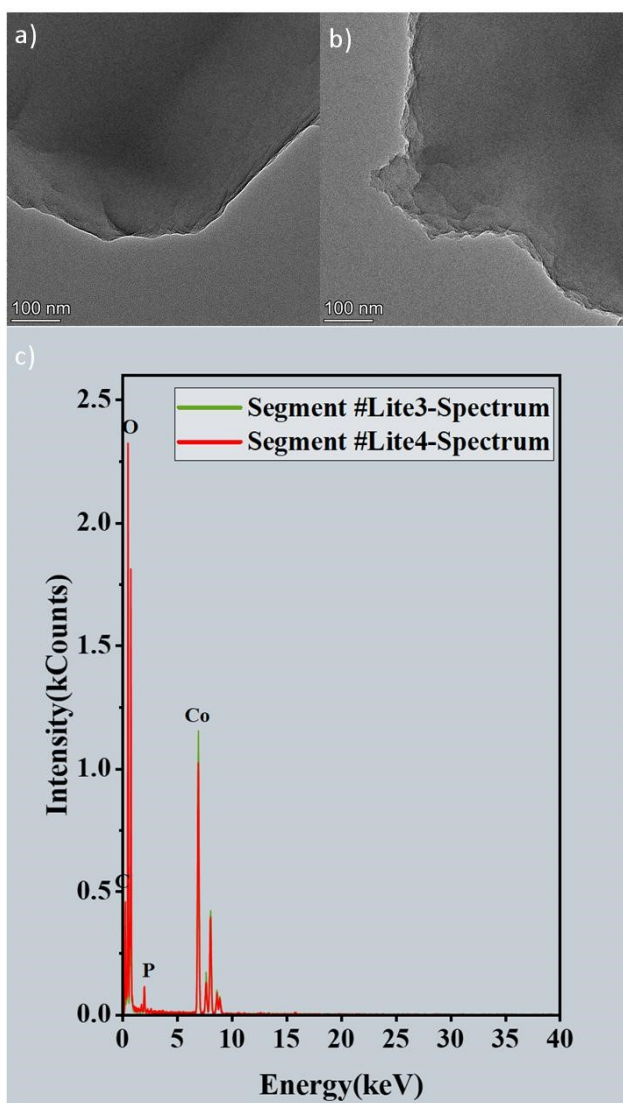

Fig. S1. (a) TEM of BC, (b) TEM of PBC

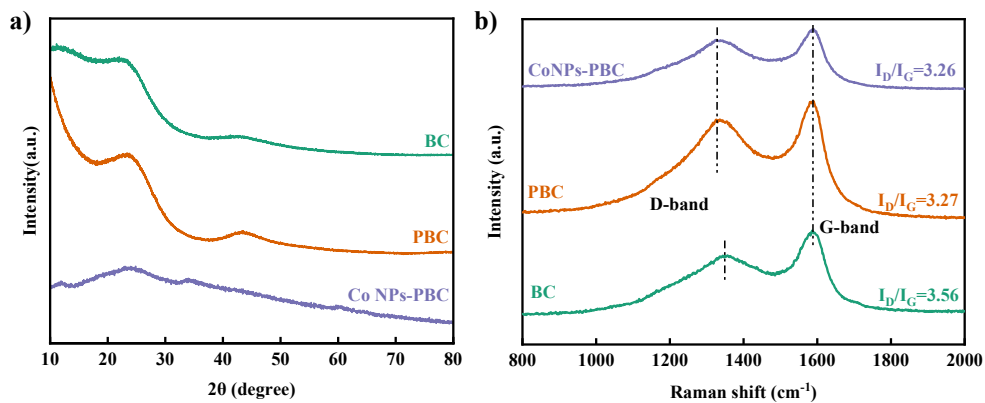

Fig. S2. (a) XRD of BC, PBC, Co NP-PBC; (b) Raman spectra of BC, PBC, Co NP-PBC

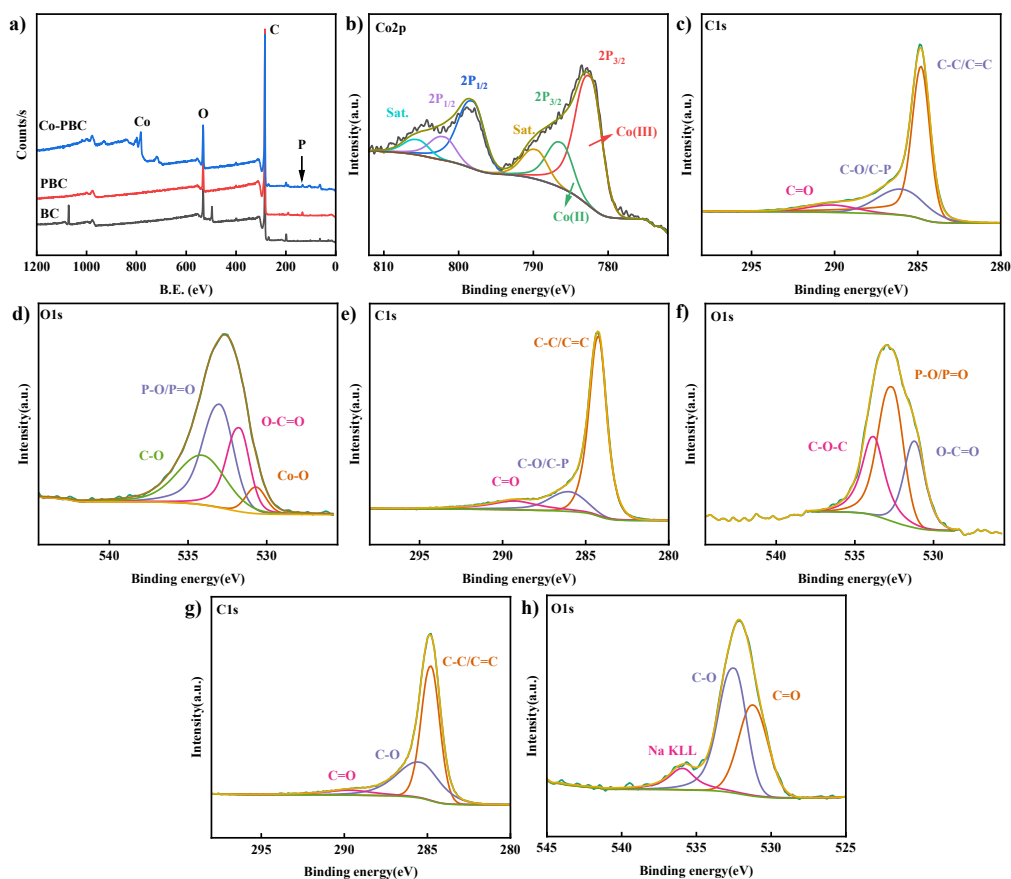

Fig. S3. (a) Total XPS spectra of BC, PBC, and Co NPs-PBC (b-d) Co 2p, C1s, and O1s spectra of Co NP-PBC (e-f) C1s, and O1s spectra of PBC; (g-h) C1s, and O1s spectra of BC

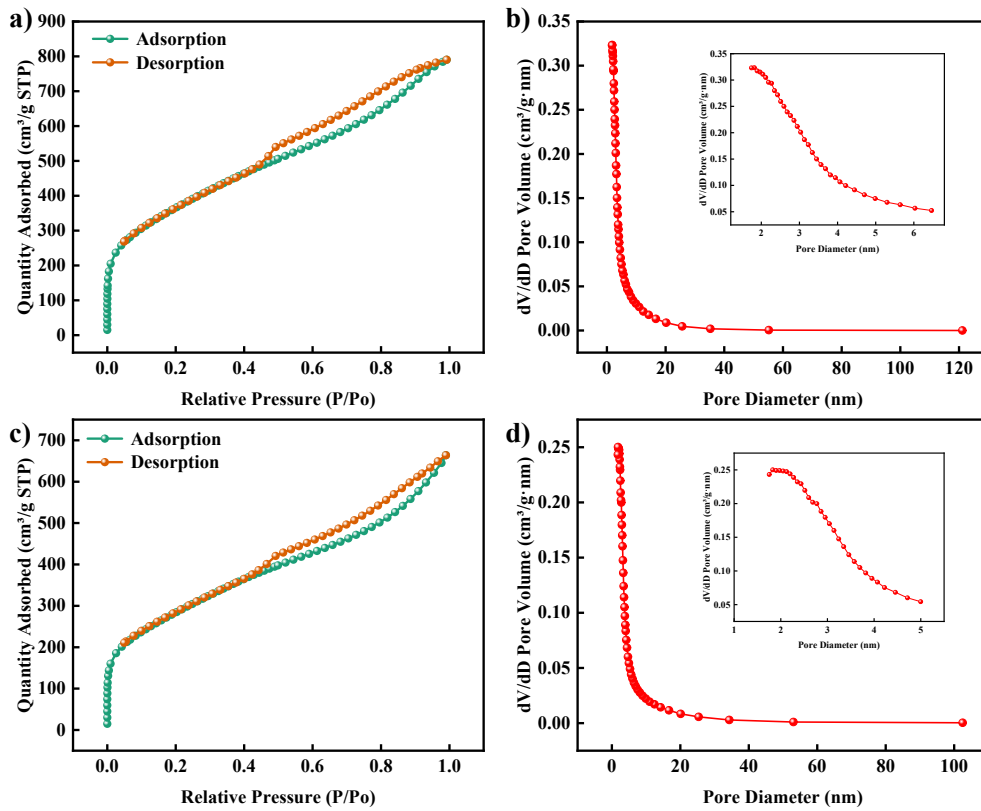

Fig. S4. N<sub>2</sub> adsorption-desorption curves and pore size distributions for (a,b) PBC, (c,d) Co NP-PBC catalysts.

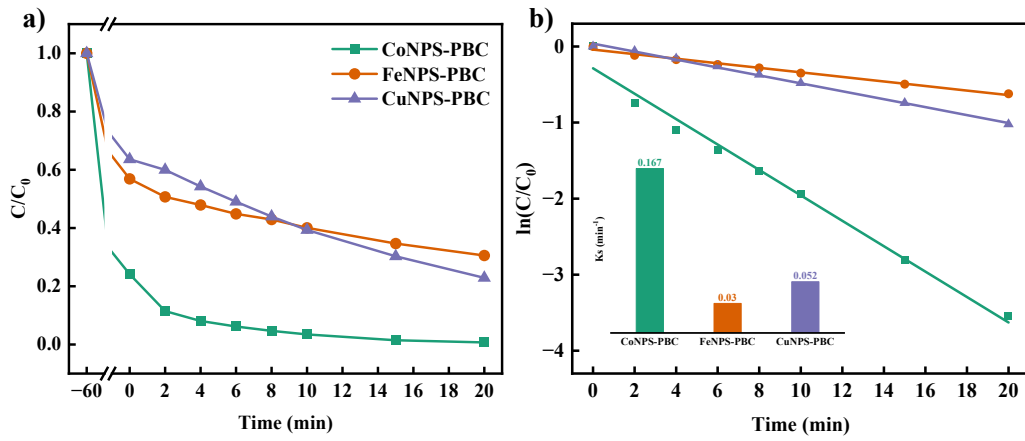

Fig. S5. (a) The degradation efficiency of TCH and (b) its corresponding reaction kinetics coefficients by catalysts loaded with different metals.

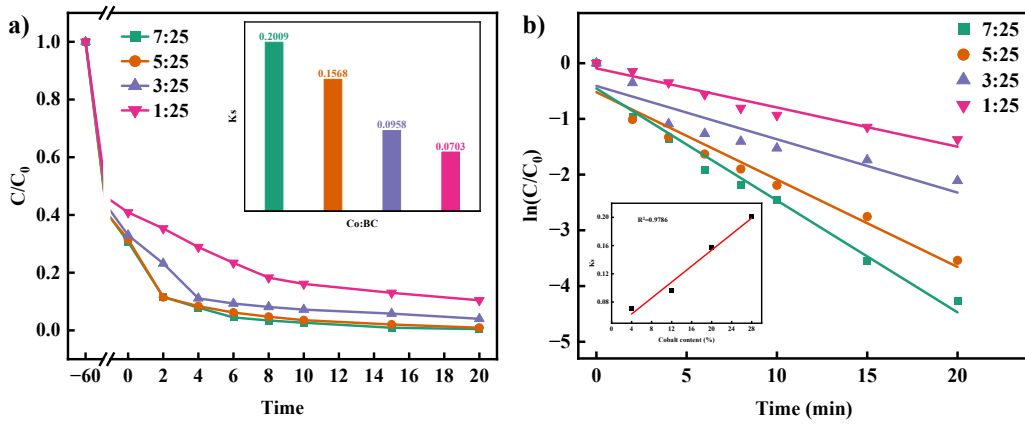

Fig. S6. (a) The effect of different cobalt doping on the degradation efficiency of TCH and its reaction kinetic parameters, (b) Fitting of first-order reaction kinetic parameters of cobalt with different doping amounts and correlation between cobalt dosage and reaction kinetic parameters

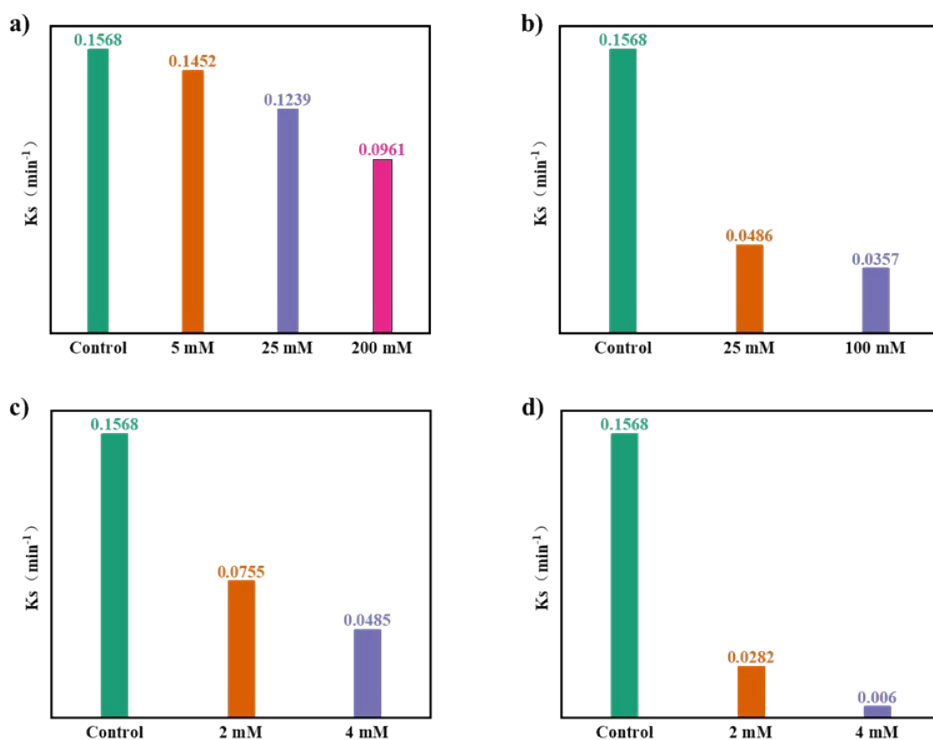

Fig. S7. Effects of different kinds of quenching agents on the first-order reaction kinetic coefficients of TCH degradation, (a) MeOH, (b) TBA, (c) p-BQ, (d) L-his.

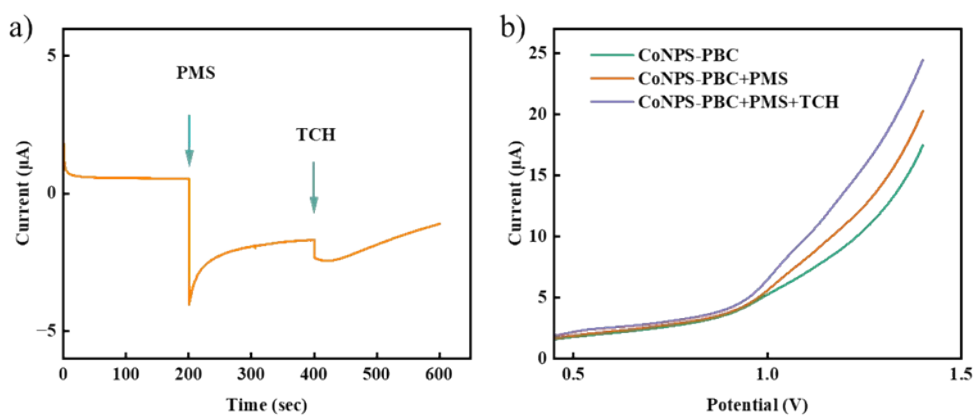

Fig. S8. (a) Current response of PMS and TCH added to Co NPs-PBC/PMS system, (b) LSV under different conditions

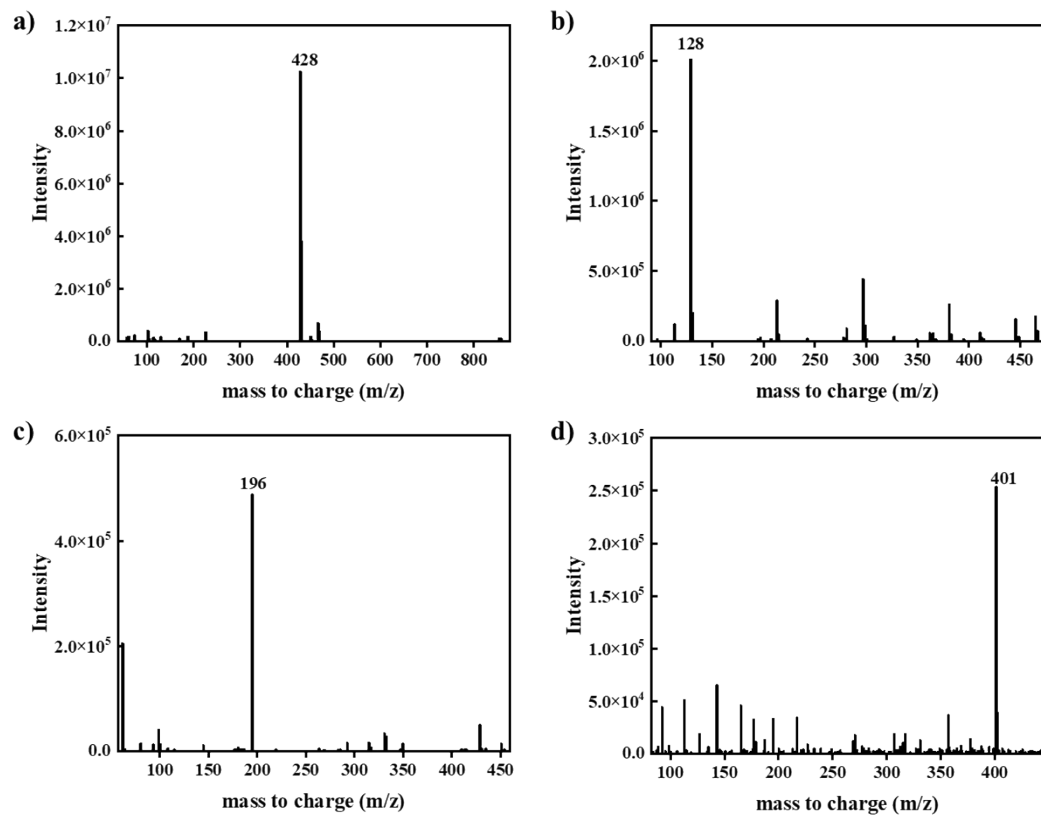

Fig. S9. The m/z and retention time of TCH degradation intermediates

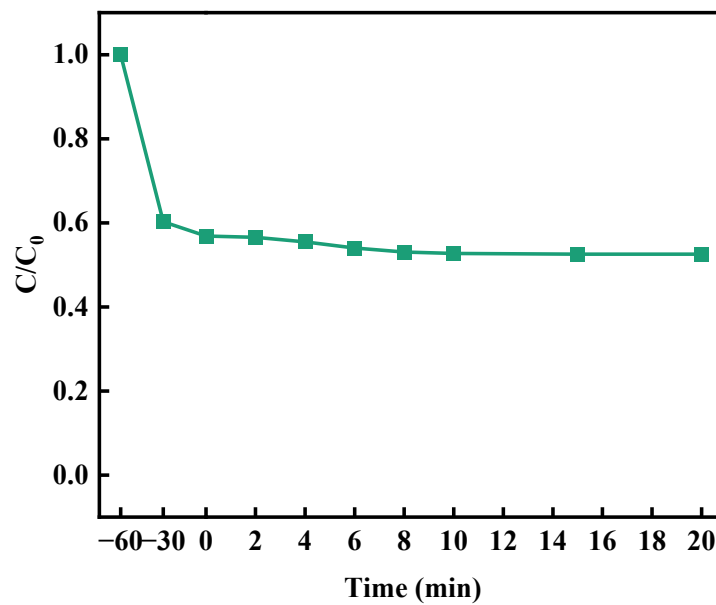

Fig. S10. Co NPs-PBC reuse degradation of TCH.

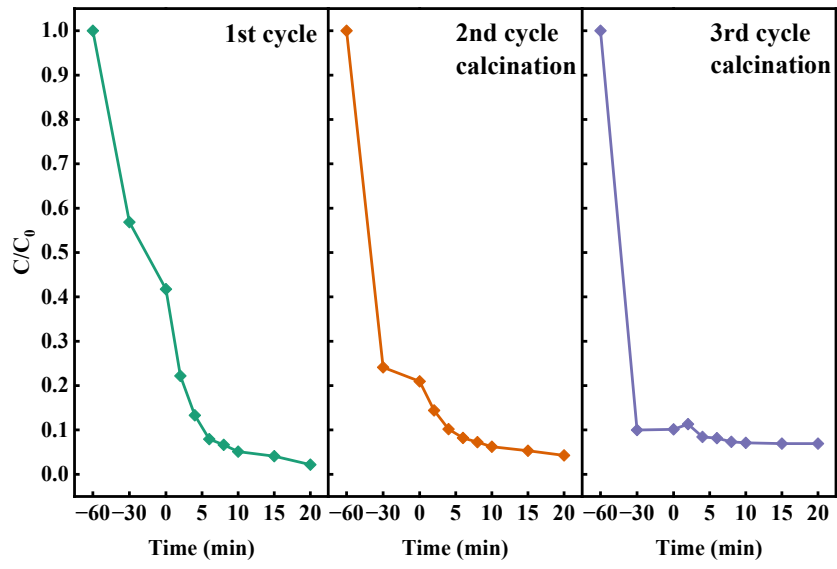

Fig. S11. Reusability Experiment of CPBC.

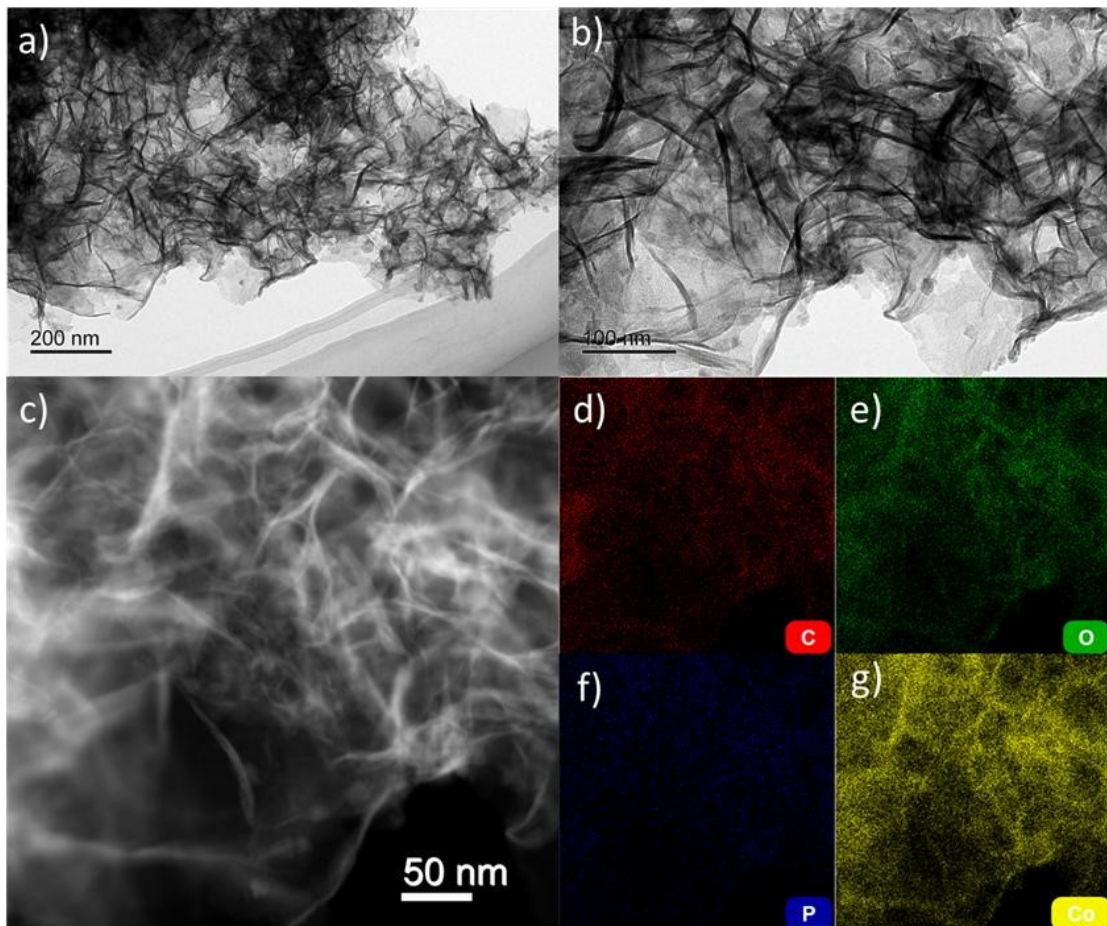

Fig. S12. TEM of CPBC after three cycles



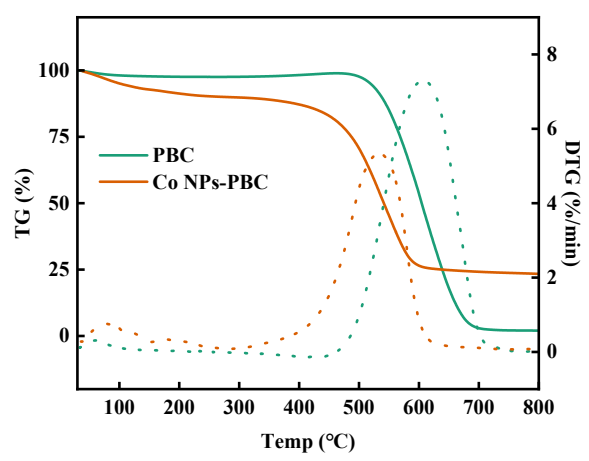

Fig. S13. Thermogravimetry of PBC, Co NP-PBC

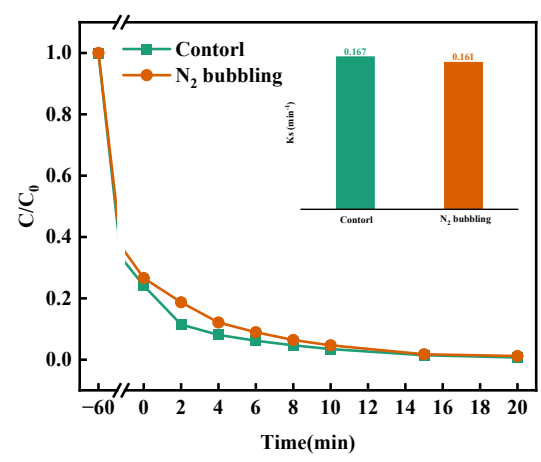

Fig. S14. Degradation of TCH under different gas conditions

Table. S1. Condensed Fukui Function of TCH

| Atom  | q(N)    | q(N+1)  | q(N-1)  | f <sup>-</sup> | f <sup>0</sup> |
|-------|---------|---------|---------|----------------|----------------|
| 1(O)  | -0.2184 | -0.2478 | -0.2121 | 0.0064         | 0.0178         |
| 2(O)  | -0.2072 | -0.2193 | -0.2012 | 0.0060         | 0.0091         |
| 3(O)  | -0.2307 | -0.3044 | -0.2092 | 0.0214         | 0.0476         |
| 4(O)  | -0.1719 | -0.1864 | -0.1422 | 0.0296         | 0.0221         |
| 5(O)  | -0.1557 | -0.2171 | -0.1363 | 0.0194         | 0.0404         |
| 6(O)  | -0.2491 | -0.2801 | -0.1980 | 0.0511         | 0.0411         |
| 7(O)  | -0.1718 | -0.1961 | -0.1478 | 0.0240         | 0.0242         |
| 8(O)  | -0.3112 | -0.3388 | -0.2342 | 0.0770         | 0.0523         |
| 9(N)  | -0.1019 | -0.0994 | 0.0114  | 0.1133         | 0.0554         |
| 10(N) | -0.1548 | -0.1628 | -0.1244 | 0.0303         | 0.0192         |
| 11(C) | -0.0204 | -0.0217 | -0.0203 | 0.0001         | 0.0007         |
| 12(C) | -0.0248 | -0.0279 | -0.0208 | 0.0040         | 0.0035         |
| 13(C) | -0.0539 | -0.0562 | -0.0503 | 0.0036         | 0.0029         |
| 14(C) | 0.0757  | 0.0654  | 0.0753  | -0.0004        | 0.0049         |
| 15(C) | 0.0131  | 0.0105  | 0.0248  | 0.0117         | 0.0072         |
| 16(C) | 0.0901  | 0.0882  | 0.0906  | 0.0005         | 0.0012         |
| 17(C) | -0.0596 | -0.0808 | -0.0385 | 0.0211         | 0.0212         |
| 18(C) | 0.1228  | 0.0380  | 0.1247  | 0.0020         | 0.0434         |
| 19(C) | 0.0918  | 0.0927  | 0.1132  | 0.0214         | 0.0103         |
| 20(C) | 0.0156  | -0.0159 | 0.0176  | 0.0020         | 0.0167         |
| 21(C) | 0.1388  | 0.1318  | 0.1449  | 0.0061         | 0.0066         |
| 22(C) | 0.1270  | 0.0484  | 0.1395  | 0.0125         | 0.0455         |
| 23(C) | -0.0538 | -0.0754 | -0.0324 | 0.0214         | 0.0215         |
| 24(C) | -0.0279 | -0.0397 | -0.0177 | 0.0102         | 0.0110         |
| 25(C) | -0.0911 | -0.0988 | -0.0865 | 0.0046         | 0.0062         |
| 26(C) | -0.0485 | -0.0740 | -0.0283 | 0.0201         | 0.0228         |
| 27(C) | -0.0442 | -0.0477 | -0.0184 | 0.0258         | 0.0146         |
| 28(C) | -0.0433 | -0.0479 | -0.0202 | 0.0231         | 0.0138         |
| 29(C) | 0.0942  | 0.0619  | 0.1122  | 0.0180         | 0.0251         |
| 30(C) | 0.1613  | 0.1553  | 0.1801  | 0.0188         | 0.0124         |
| 31(C) | -0.0182 | -0.0810 | 0.0061  | 0.0244         | 0.0436         |
| 32(C) | -0.0663 | -0.0972 | -0.0499 | 0.0164         | 0.0236         |

Table. S2. Laplace Bond Order of TCH.

| Bond        | Laplace Bond Order | Bond        | Laplace Bond Order |
|-------------|--------------------|-------------|--------------------|
| 1 O — 14 C  | 0.3398             | 14 C — 18 C | 0.9686             |
| 2 O — 16 C  | 0.3453             | 14 C — 19 C | 0.9675             |
| 3 O — 18 C  | 0.8591             | 15 C — 21 C | 1.0855             |
| 4 O — 19 C  | 0.5922             | 16 C — 20 C | 1.059              |
| 5 O — 22 C  | 0.6429             | 16 C — 25 C | 0.979              |
| 6 O — 21 C  | 1.1032             | 17 C — 18 C | 1.4445             |
| 7 O — 29 C  | 0.533              | 17 C — 22 C | 1.5066             |
| 8 O — 30 C  | 1.0542             | 19 C — 23 C | 1.6892             |
| 9 N — 15 C  | 0.6945             | 20 C — 24 C | 1.3538             |
| 9 N — 27 C  | 0.7445             | 20 C — 26 C | 1.5397             |
| 9 N — 28 C  | 0.7379             | 21 C — 23 C | 1.2215             |
| 10 N — 30 C | 1.2373             | 22 C — 24 C | 1.2663             |
| 11 C — 13 C | 0.9229             | 23 C — 30 C | 1.1058             |
| 11 C — 14 C | 0.9496             | 24 C — 29 C | 1.4141             |
| 11 C — 15 C | 0.934              | 26 C — 31 C | 1.5347             |
| 12 C — 13 C | 0.9663             | 29 C — 32 C | 1.5507             |
| 12 C — 16 C | 0.9201             | 31 C — 32 C | 1.5865             |
| 12 C — 17 C | 1.004              |             |                    |

Table. S3. Toxicity Analysis of Different Intermediates.

| Number  | Oral rat         | Developmental toxicity |                            | Mutagenicity |                       | Bioconcent |
|---------|------------------|------------------------|----------------------------|--------------|-----------------------|------------|
|         | LD <sub>50</sub> | Predicted              | Predicted result           | Predicted    | Predicted             | r-ation    |
|         | mg/kg            | value                  |                            | value        | result                | factor     |
| TCH-444 | 1524.04          | 0.86                   | Developmental toxicant     | 0.60         | Mutagenicity Positive | 0.71       |
| A1-401  | 1043.63          | 0.85                   | Developmental toxicant     | 0.70         | Mutagenicity Positive | 0.85       |
| A2-345  | 2671.47          | 0.77                   | Developmental toxicant     | 0.92         | Mutagenicity Positive | 2.30       |
| A3-192  | 2145.96          | 0.83                   | Developmental toxicant     | 0.49         | Mutagenicity Negative | N/A        |
| A4-113  | 3003.45          | 0.68                   | Developmental toxicant     | 0.11         | Mutagenicity Negative | 3.11       |
| A5-108  | 263.68           | 0.60                   | Developmental toxicant     | 0.09         | Mutagenicity Negative | 11.34      |
| A6-86   | 946.25           | 0.69                   | Developmental toxicant     | 0.39         | Mutagenicity Negative | N/A        |
| A7-166  | N/A              | 0.73                   | Developmental toxicant     | 0.22         | Mutagenicity Negative | N/A        |
| A8-239  | 1518.86          | 0.78                   | Developmental toxicant     | 0.27         | Mutagenicity Negative | 0.89       |
| A9-122  | 776.75           | 0.19                   | Developmental non-toxicant | 0.00         | Mutagenicity Negative | N/A        |
| A10-196 | 435.95           | 0.64                   | Developmental toxicant     | 0.36         | Mutagenicity Negative | 0.54       |
| A11-128 | 3101.63          | 0.80                   | Developmental toxicant     | 0.21         | Mutagenicity Negative | 2.76       |
| A12-428 | 1420.42          | 0.84                   | Developmental toxicant     | 0.63         | Mutagenicity Positive | 1.01       |
| A13-384 | 918.67           | 0.85                   | Developmental toxicant     | 0.86         | Mutagenicity Positive | 1.20       |
| A14-192 | N/A              | 0.68                   | Developmental toxicant     | 0.64         | Mutagenicity Positive | 10.63      |
| A15-169 | 1070.61          | 0.72                   | Developmental toxicant     | 0.27         | Mutagenicity Negative | 0.13       |
| A16-108 | 263.68           | 0.60                   | Developmental toxicant     | 0.09         | Mutagenicity Negative | 11.34      |
| A17-56  | 64.96            | 0.64                   | Developmental toxicant     | 0.51         | Mutagenicity Positive | N/A        |
